# Supplementary material
Source: Royal Society of Chemistry journal article supplement (doi:10.1039/d6ta02057g)
Supplement: d6ta02057g1.pdf [file d6ta02057g1.pdf]

Supporting Information

## **Interfacial Stress Limits PbTe Module Reliability: Porous Fe Foam Mitigates Thermal-Mismatch Stress**

Zhoumin Jiang,<sup>a,b</sup> Xiaojian Tan,<sup>\*b,c</sup> Zongwei Zhang,<sup>\*b</sup> Ailong Yang,<sup>b</sup> Jinqu Feng,<sup>b</sup>  
Chenhao Han,<sup>b</sup> Lianghan Fan,<sup>b</sup> Jianfeng Cai,<sup>b</sup> Guo-Qiang Liu,<sup>b,c</sup> Jun Jiang<sup>\*b,c</sup>

*<sup>a</sup>School of Material Science and Chemical Engineering, Ningbo University, Ningbo, 315211, China.*

*<sup>b</sup>Ningbo Institute of Materials Technology and Engineering, Chinese Academy of Sciences, Ningbo, 315201, China*

*<sup>c</sup>University of Chinese Academy of Sciences, Beijing 100049, China*

*Corresponding authors: E-mail: tanxiaojian@nimte.ac.cn;  
zhangzongwei@nimte.ac.cn; jjun@nimte.ac.cn.*

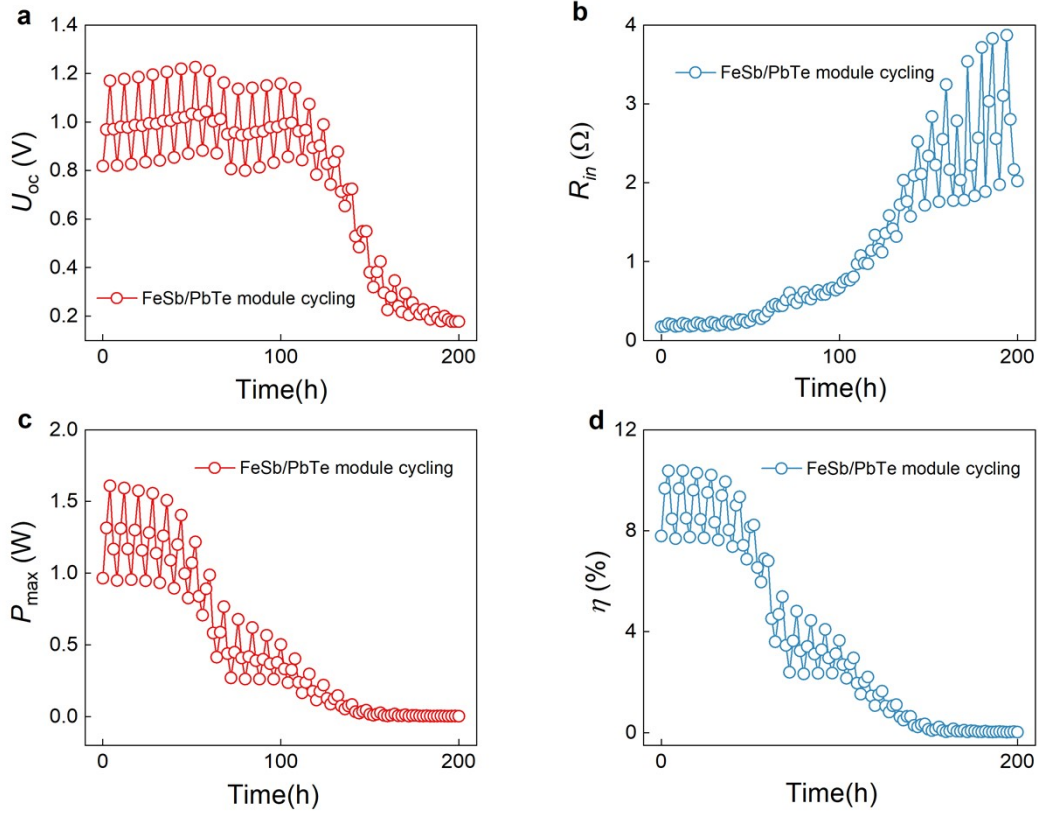

**Figure S1. Key parameters of a PbTe-based thermoelectric device featuring an FeSb barrier layer during cyclic thermal stress testing: (a) open-circuit voltage, (b) internal device resistance, (c) maximum output power, and (d) conversion efficiency. The thermal cycling protocol involved varying the hot-side temperature between 643 K and 753 K, with the cold-side temperature maintained at a constant 300 K.**

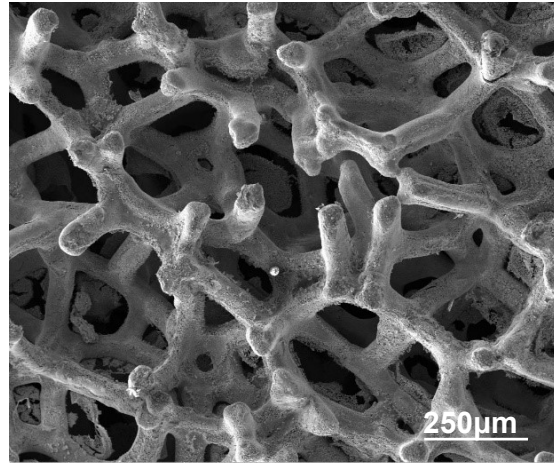

**Figure S2.** SEM image of Fe foam, showing a porous and interconnected metallic framework.

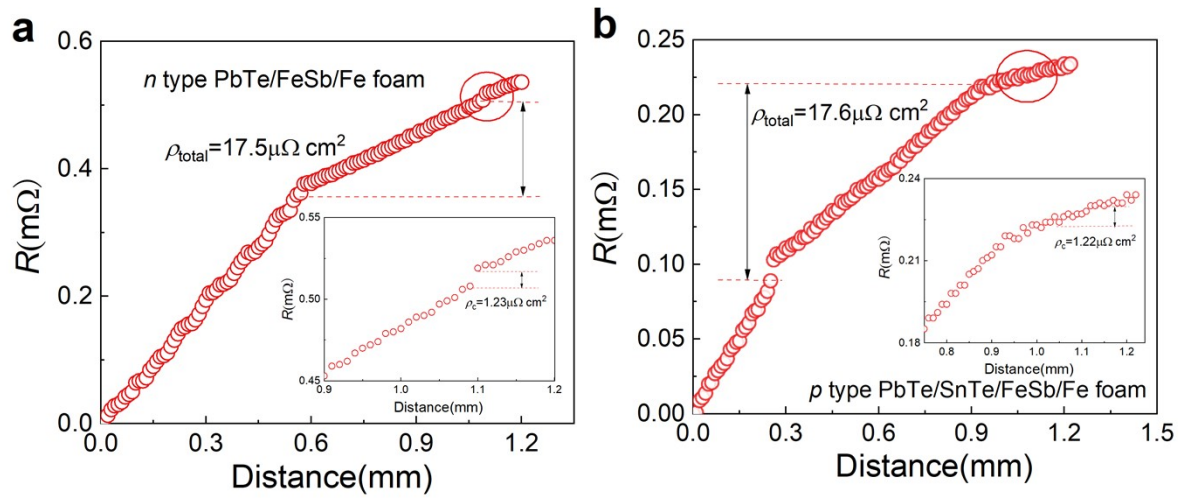

**Figure S3.** The total interface resistivity ( $\rho_{\text{total}}$ ) at the hot side for the (a) *n*-type and (b) *p*-type thermoelectric legs. The insets show the corresponding interface resistivity for the Fe foam/FeSb joints.

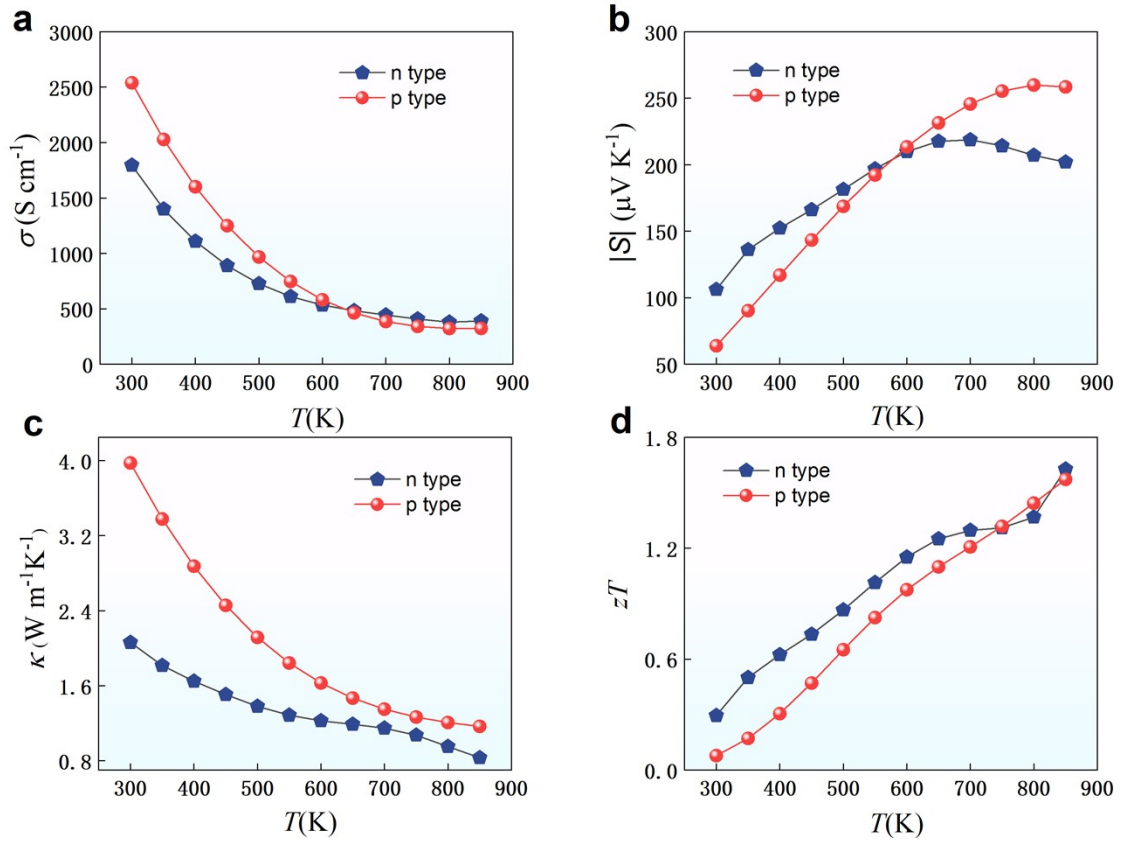

**Figure S4.** Temperature-dependent thermoelectric properties of *p*-type Na<sub>0.02</sub>Pb<sub>0.98</sub>Te and *n*-type Pb<sub>0.954</sub>Ge<sub>0.05</sub>Cu<sub>0.02</sub>Te<sub>0.96</sub>Se<sub>0.04</sub>. Plotted as a function of temperature are (a) electrical conductivity ( $\sigma$ ), (b) the absolute Seebeck coefficient ( $|S|$ ), (c) thermal conductivity ( $\kappa$ ), and (d) the dimensionless figure of merit ( $zT$ ).

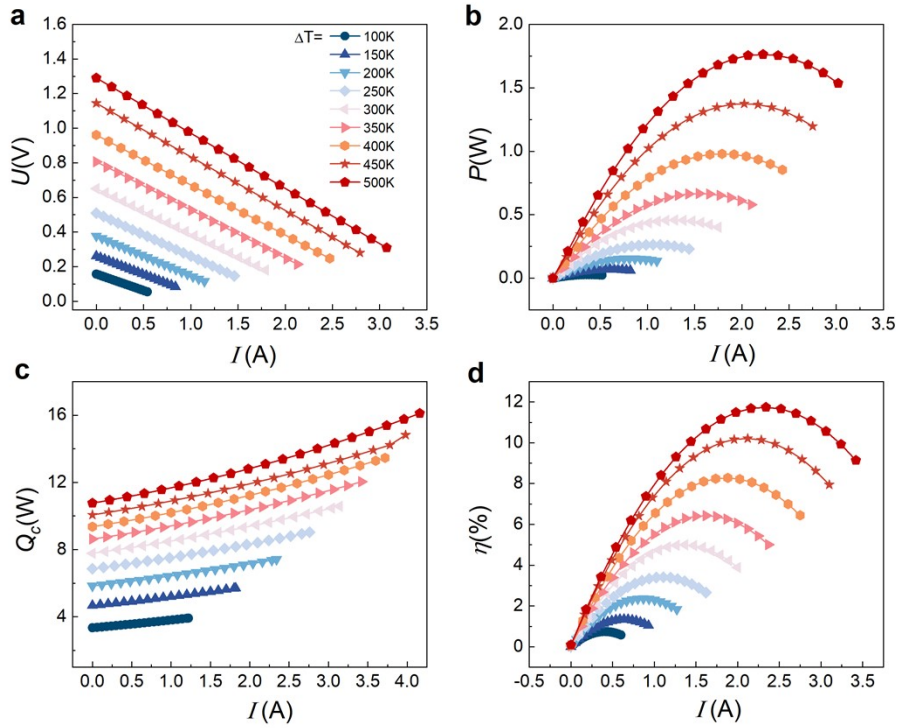

**Figure S5.** Characterization of the PbTe-based module. Current-dependent (a) output voltage, (b) output power, (c) heat flow out, and (d) efficiency for the module under several temperature differences.

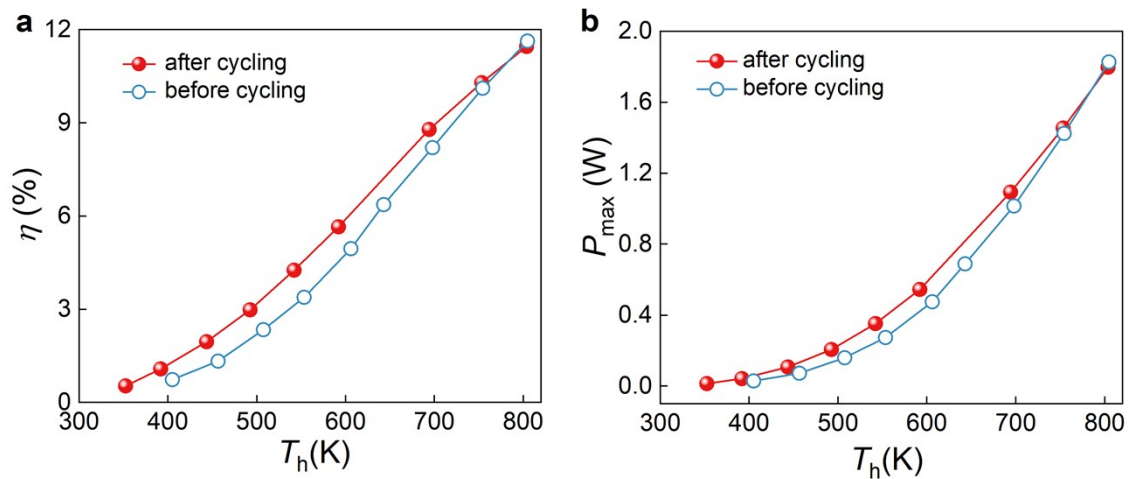

**Figure S6.** Comparison of (a) conversion efficiency and (b) maximum output power before and after thermal cycling. The results demonstrate that the module performance remains essentially unchanged.

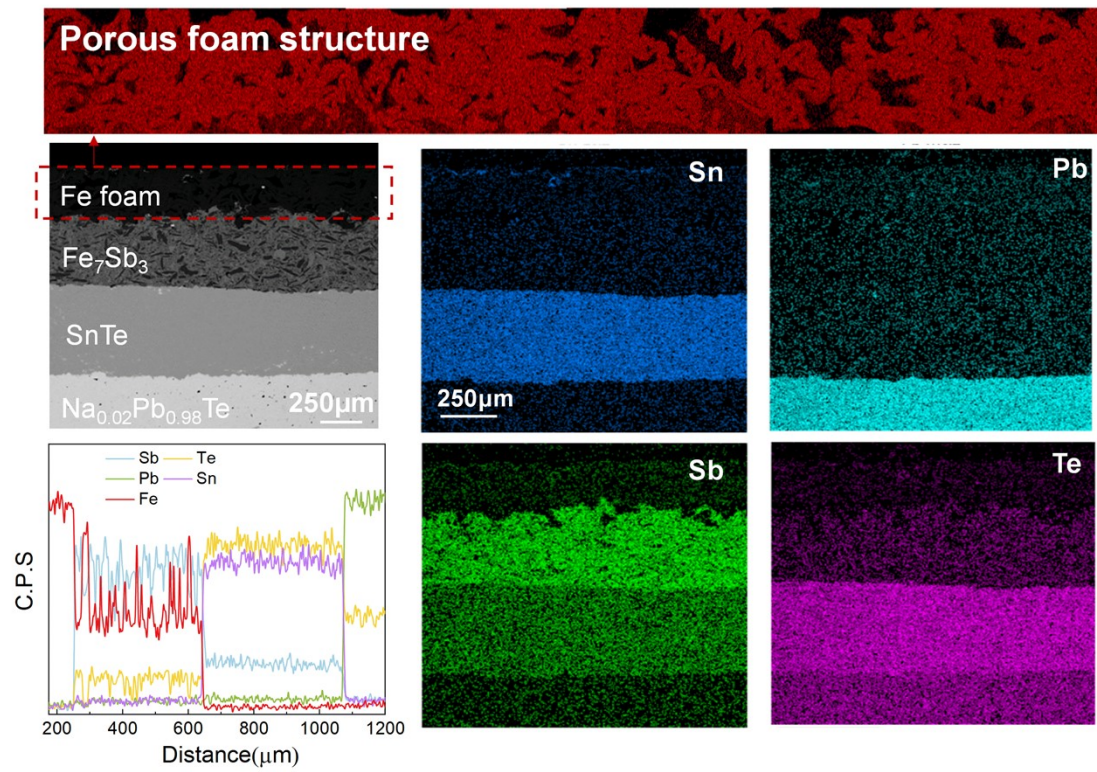

**Figure S7.** Microstructural and compositional characterization of a hot-side Fe foam/ $\text{FeSb}$ / $\text{SnTe}$ / $\text{PbTe}$  junction. The figure presents a scanning electron microscopy image, energy-dispersive X-ray spectroscopy elemental maps, and corresponding EDS line scans.

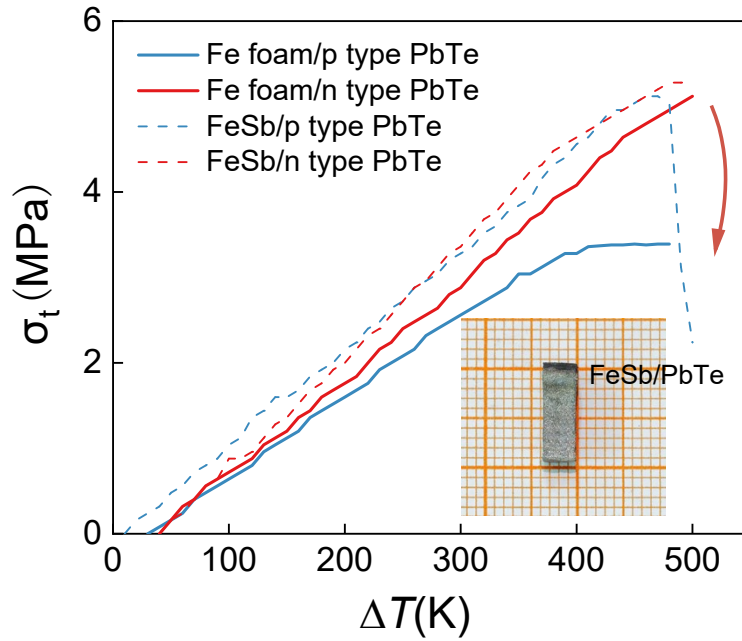

**Figure S8.** The thermal stress during the heating process of the thermoelectric leg with FeSb/PbTe joint at hot-side and the thermoelectric leg with Fe foam/FeSb joint at hot-side. Inset: A picture of the thermoelectric leg with deformation at hot-side.

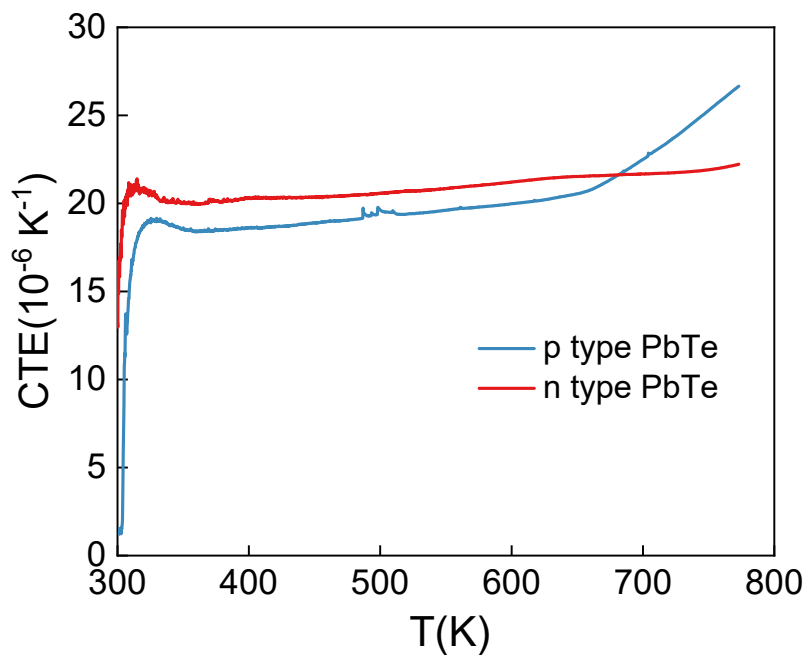

**Figure S9.** The overall coefficients of thermal expansion for the *p*-type and *n*-type thermoelectric legs. A measurable difference is observed between the two.

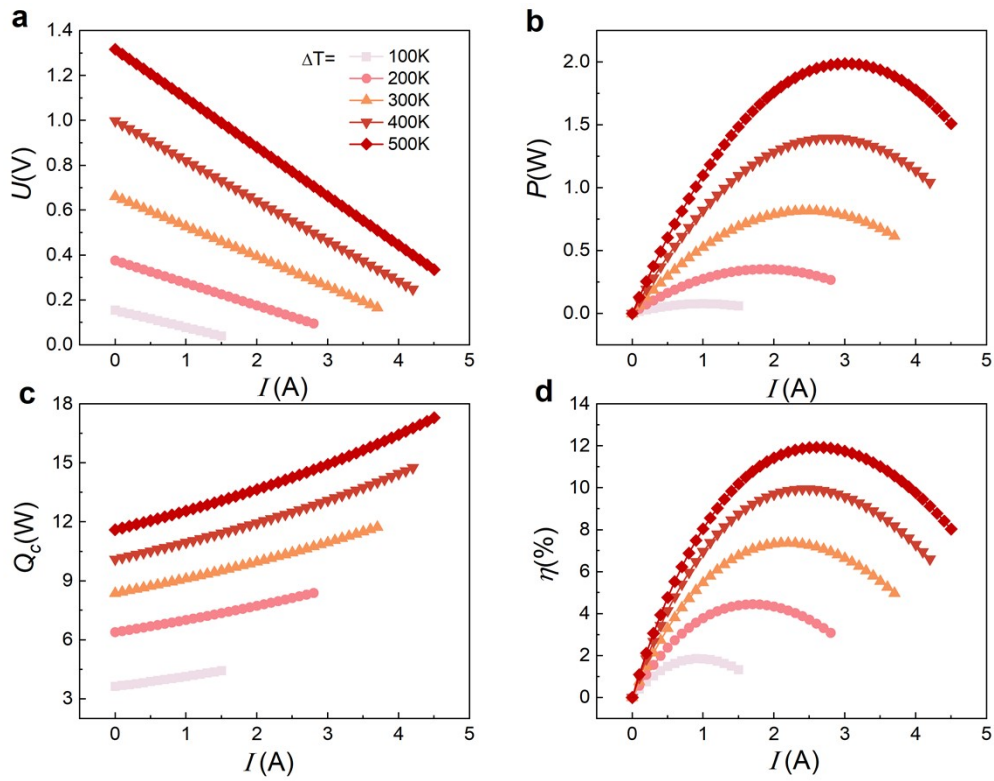

**Figure S10.** Simulation of the PbTe-based module. Current-dependent (a) output voltage, (b) output power, (c) heat flow out, and (d) efficiency for the module under several temperature differences.

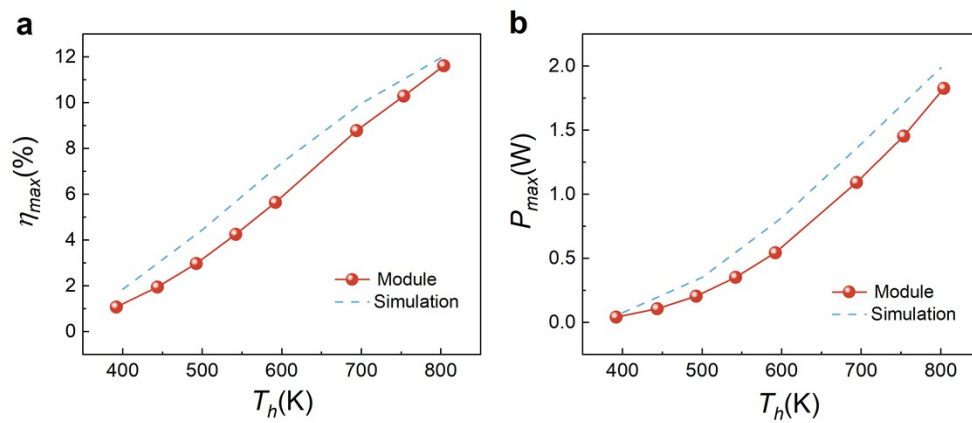

**Figure S11.** Comparison between measured and simulated properties of the PbTe-based module. (a) maximum efficiency, (b) maximum output power.

**Table S1.** The relevant material properties used in the simulation of PbTe-based thermoelectric module.

| <b>Material</b>                                      | <b>Cu</b>           | <b><i>p</i>-type PbTe</b> | <b><i>n</i>-type PbTe</b> | <b>FeSb</b>      | <b>Fe foam</b>   | <b>SnTe</b>      |
|------------------------------------------------------|---------------------|---------------------------|---------------------------|------------------|------------------|------------------|
| $\sigma$ (S m <sup>-1</sup> )                        | 5.8×10 <sup>7</sup> | 323~2538                  | 390~1795                  | ~10 <sup>6</sup> | ~10 <sup>6</sup> | ~10 <sup>5</sup> |
| CTE (10 <sup>-6</sup> K <sup>-1</sup> )              | 17.5~18.5           | 19.5~21.7                 | 18.5~20.8                 | 12.5~21.3        | 12~15            | 19~21.6          |
| C <sub>p</sub> (J kg <sup>-1</sup> K <sup>-1</sup> ) | 385                 | 190                       | 190                       | 450              | 450              | 210              |
| $\rho$ (g cm <sup>-3</sup> )                         | 8.9                 | 7.9                       | 7.8                       | 7.3              | 4.13             | 6.4              |
| $\kappa$ (W m <sup>-1</sup> K <sup>-1</sup> )        | 390                 | 1.2~3.9                   | 0.8~2                     | 11~12            | 11~12            | 2~3              |
| E (GPa)                                              | 110                 | 37~47                     | 33~43                     | 130~150          | 21~23            | 40~50            |
| $\nu$                                                | 0.35                | 0.25                      | 0.25                      | 0.27             | 0.29             | 0.28             |
